# Supplementary material for: Messages From the Past: New Insights in Plant Lectin Evolution
Source: Front Plant Sci. 2019 Jan 29;10:36. doi: 10.3389/fpls.2019.00036 (PMC6362431; doi:10.3389/fpls.2019.00036)
Supplement: Supplementary file 9 [file Table_1.XLSX]

## Sheet: Blad1
Supplementary Table 1 -Overview of the identified genes containing lectin domains in basal Streptophyta, Chlorophyta and Archaeplastida
Gene ID	Species	Lectin family
CMT084C	Cyanidioschyzon merolae	LysM
Pum0057s0007	Porphyra umbilicalis	Malectin
Pum0081s0011	Porphyra umbilicalis	Malectin
Pum0098s0039	Porphyra umbilicalis	Malectin
Pum0098s0040	Porphyra umbilicalis	Malectin
Pum0135s0049	Porphyra umbilicalis	Malectin
Pum0176s0034	Porphyra umbilicalis	Malectin
Pum0178s0013	Porphyra umbilicalis	Malectin
Pum0200s0046	Porphyra umbilicalis	Malectin
Pum0257s0008	Porphyra umbilicalis	Malectin
Pum0285s0029	Porphyra umbilicalis	Malectin
Pum0300s0001	Porphyra umbilicalis	Malectin
Pum0319s0024	Porphyra umbilicalis	Malectin
Pum0319s0026	Porphyra umbilicalis	Malectin
Pum0368s0011	Porphyra umbilicalis	Malectin
Pum0438s0013	Porphyra umbilicalis	Malectin
Pum0438s0019	Porphyra umbilicalis	Malectin
Pum0512s0003	Porphyra umbilicalis	Malectin
Pum0512s0004	Porphyra umbilicalis	Malectin
Pum0954s0002	Porphyra umbilicalis	Malectin
Pum1304s0002	Porphyra umbilicalis	Malectin
11578	Cyanophora paradoxa	Ricin B
38889	Cyanophora paradoxa	LysM
13043	Cyanophora paradoxa	LysM
37216	Cyanophora paradoxa	LysM
53222	Cyanophora paradoxa	LysM
108285	Micromonas sp. RCC299	LysM
109611	Micromonas sp. RCC299	LysM
61610	Micromonas sp. RCC299	LysM
52564	Micromonas sp. RCC299	LysM
56314	Micromonas sp. RCC299	LysM
55270	Micromonas sp. RCC299	legume lectin
61824	Micromonas sp. RCC299	legume lectin
55351	Micromonas sp. RCC299	legume lectin
estExt_fgenesh1_pg.C_Chr_10351	Ostreococcus lucimarinus	Legume lectin domain
fgenesh1_pg.C_Chr_19000031	Ostreococcus lucimarinus	Legume lectin domain
ost_01_004_029	Ostreococcus lucimarinus	Legume lectin domain
estExt_fgenesh1_pg.C_Chr_70021	Ostreococcus lucimarinus	LysM domain
eugene.0400010003	Ostreococcus lucimarinus	LysM domain
fgenesh1_pg.C_Chr_8000288	Ostreococcus lucimarinus	LysM domain
ost_13_009_031	Ostreococcus lucimarinus	LysM domain
ost_14_004_056	Ostreococcus lucimarinus	LysM domain
ost_21_006_038	Ostreococcus lucimarinus	LysM domain
jgi|ChlNC64A_1|141831|IGS.gm_39_00011	Chlorella NC64A	GNA
>jgi|ChlNC64A_1|136708|IGS.gm_17_00112	Chlorella NC64A	hevein
>jgi|ChlNC64A_1|53729|fgenesh3_pg.C_scaffold_17000062	Chlorella NC64A	hevein
>jgi|ChlNC64A_1|58528|estExt_fgenesh3_pg.C_170061	Chlorella NC64A	hevein
Cre17.g705200	Chlamydomonas reinhardtii	GNA
Cre13.g570700	Chlamydomonas reinhardtii	hevein
Cre05.g233304	Chlamydomonas reinhardtii	hevein
Cre17.g696900	Chlamydomonas reinhardtii	hevein
Cre14.g632700	Chlamydomonas reinhardtii	jacalin
Cre02.g111550	Chlamydomonas reinhardtii	jacalin
Cre17.g696950	Chlamydomonas reinhardtii	jacalin
Cre09.g404050	Chlamydomonas reinhardtii	jacalin
Cre07.g325739	Chlamydomonas reinhardtii	jacalin
Cre14.g632650	Chlamydomonas reinhardtii	jacalin
Cre14.g632750	Chlamydomonas reinhardtii	jacalin
Cre09.g400800	Chlamydomonas reinhardtii	jacalin
Cre17.g696900	Chlamydomonas reinhardtii	jacalin
Cre14.g631150	Chlamydomonas reinhardtii	LysM
Cre06.g304913	Chlamydomonas reinhardtii	LysM
Cre17.g697300	Chlamydomonas reinhardtii	LysM
Cre08.g376740	Chlamydomonas reinhardtii	LysM
Cre14.g631100	Chlamydomonas reinhardtii	LysM
Cre01.g024100	Chlamydomonas reinhardtii	LysM
Cre09.g393765	Chlamydomonas reinhardtii	LysM
Cre07.g339600	Chlamydomonas reinhardtii	LysM
Cre14.g619450	Chlamydomonas reinhardtii	LysM
Cre16.g667100	Chlamydomonas reinhardtii	LysM
Cre10.g456950	Chlamydomonas reinhardtii	LysM
Cre17.g736100	Chlamydomonas reinhardtii	LysM
Cre12.g490700	Chlamydomonas reinhardtii	LysM
Cre06.g307100	Chlamydomonas reinhardtii	LysM
Cre03.g175351	Chlamydomonas reinhardtii	LysM
Cre14.g618641	Chlamydomonas reinhardtii	LysM
Cre14.g611700	Chlamydomonas reinhardtii	LysM
Cre04.g227800	Chlamydomonas reinhardtii	LysM
Cre02.g089650	Chlamydomonas reinhardtii	LysM
Cre12.g509250	Chlamydomonas reinhardtii	LysM
Cre09.g404250	Chlamydomonas reinhardtii	LysM
Cre14.g621400	Chlamydomonas reinhardtii	Nictaba
Cre14.g621100	Chlamydomonas reinhardtii	Nictaba
Cre03.g167712	Chlamydomonas reinhardtii	Ricin B
Cre09.g406625	Chlamydomonas reinhardtii	Ricin B
Cre10.g421150	Chlamydomonas reinhardtii	Ricin B
Cre11.g481375	Chlamydomonas reinhardtii	Ricin B
Cre16.g660601	Chlamydomonas reinhardtii	Ricin B
kfl00329_0110	Klebsormidium nitens	GNA
kfl00004_0390	Klebsormidium nitens	GNA
kfl00038_0250	Klebsormidium nitens	GNA
kfl01498_0010	Klebsormidium nitens	legume lectin
kfl100264_0240	Klebsormidium nitens	LysM
kfl100869_0010	Klebsormidium nitens	LysM
kfl100467_0040	Klebsormidium nitens	LysM
kfl100454_0050	Klebsormidium nitens	LysM
kfl100273_0020	Klebsormidium nitens	LysM
kfl00665_0040	Klebsormidium nitens	LysM
kfl00806_0020	Klebsormidium nitens	LysM
kfl00050_0010	Klebsormidium nitens	LysM
kfl00491_0080	Klebsormidium nitens	LysM
kfl00272_0140	Klebsormidium nitens	LysM
kfl00102_0250	Klebsormidium nitens	LysM
kfl00203_0060	Klebsormidium nitens	LysM
kfl01069_0020	Klebsormidium nitens	LysM
kfl00022_0260	Klebsormidium nitens	LysM
kfl00124_0060	Klebsormidium nitens	LysM
kfl00029_0320	Klebsormidium nitens	LysM
kfl00017_0500	Klebsormidium nitens	LysM
kfl00426_0010	Klebsormidium nitens	LysM
kfl00392_0050	Klebsormidium nitens	LysM
kfl00012_0610	Klebsormidium nitens	LysM
kfl00141_0210	Klebsormidium nitens	LysM
kfl00001_0190	Klebsormidium nitens	Nictaba
kfl00985_0010	Klebsormidium nitens	Nictaba
kfl00110_0240	Klebsormidium nitens	Ricin B
kfl00219_0280	Klebsormidium nitens	Ricin B
kfl00920_0070	Klebsormidium nitens	Ricin B
CBR_g24426	Chara braunii	hevein
CBR_g51925	Chara braunii	LysM
CBR_g50784	Chara braunii	LysM
CBR_g51112	Chara braunii	LysM
CBR_g41652	Chara braunii	LysM
CBR_g49581	Chara braunii	LysM
CBR_g41670	Chara braunii	LysM
CBR_g49256	Chara braunii	LysM
CBR_g44510	Chara braunii	LysM
CBR_g91196	Chara braunii	LysM
CBR_g30047	Chara braunii	LysM
CBR_g50598	Chara braunii	LysM
CBR_g49675	Chara braunii	LysM
CBR_g8984	Chara braunii	LysM
CBR_g8619	Chara braunii	LysM
CBR_g47097	Chara braunii	Nictaba
Mapoly0107s0008	Marchantia polymorpha	Agaricus bisporus agglutinin
Mapoly0107s0009	Marchantia polymorpha	Agaricus bisporus agglutinin
Mapoly0118s0045	Marchantia polymorpha	Agaricus bisporus agglutinin
Mapoly0118s0047	Marchantia polymorpha	Agaricus bisporus agglutinin
Mapoly0118s0048	Marchantia polymorpha	Agaricus bisporus agglutinin
Mapoly0118s0049	Marchantia polymorpha	Agaricus bisporus agglutinin
Mapoly0128s0001	Marchantia polymorpha	Agaricus bisporus agglutinin
Mapoly0329s0001	Marchantia polymorpha	Agaricus bisporus agglutinin
Mapoly0468s0001	Marchantia polymorpha	Agaricus bisporus agglutinin
Mapoly0528s0001	Marchantia polymorpha	Agaricus bisporus agglutinin
Mapoly0970s0001	Marchantia polymorpha	Agaricus bisporus agglutinin
Mapoly2070s0001	Marchantia polymorpha	Agaricus bisporus agglutinin
Mapoly0028s0020	Marchantia polymorpha	cyanovirin
Mapoly0032s0060	Marchantia polymorpha	cyanovirin
Mapoly0011s0183	Marchantia polymorpha	EUL
Mapoly0080s0058	Marchantia polymorpha	EUL
Mapoly0083s0050	Marchantia polymorpha	EUL
Mapoly0001s0210	Marchantia polymorpha	GNA
Mapoly0001s0211	Marchantia polymorpha	GNA
Mapoly0001s0488	Marchantia polymorpha	GNA
Mapoly0002s0225	Marchantia polymorpha	GNA
Mapoly0009s0001	Marchantia polymorpha	GNA
Mapoly0009s0002	Marchantia polymorpha	GNA
Mapoly0009s0004	Marchantia polymorpha	GNA
Mapoly0012s0025	Marchantia polymorpha	GNA
Mapoly0024s0073	Marchantia polymorpha	GNA
Mapoly0026s0080	Marchantia polymorpha	GNA
Mapoly0042s0077	Marchantia polymorpha	GNA
Mapoly0042s0094	Marchantia polymorpha	GNA
Mapoly0042s0095	Marchantia polymorpha	GNA
Mapoly0044s0105	Marchantia polymorpha	GNA
Mapoly0044s0106	Marchantia polymorpha	GNA
Mapoly0044s0107	Marchantia polymorpha	GNA
Mapoly0044s0109	Marchantia polymorpha	GNA
Mapoly0050s0050	Marchantia polymorpha	GNA
Mapoly0061s0017	Marchantia polymorpha	GNA
Mapoly0066s0089	Marchantia polymorpha	GNA
Mapoly0078s0027	Marchantia polymorpha	GNA
Mapoly0086s0059	Marchantia polymorpha	GNA
Mapoly0086s0060	Marchantia polymorpha	GNA
Mapoly0095s0069	Marchantia polymorpha	GNA
Mapoly0101s0038	Marchantia polymorpha	GNA
Mapoly0131s0035	Marchantia polymorpha	GNA
Mapoly0131s0036	Marchantia polymorpha	GNA
Mapoly0150s0020	Marchantia polymorpha	GNA
Mapoly0208s0001	Marchantia polymorpha	GNA
Mapoly0208s0003	Marchantia polymorpha	GNA
Mapoly0212s0012	Marchantia polymorpha	GNA
Mapoly0212s0013	Marchantia polymorpha	GNA
Mapoly0342s0001	Marchantia polymorpha	GNA
Mapoly0342s0002	Marchantia polymorpha	GNA
Mapoly0342s0003	Marchantia polymorpha	GNA
Mapoly0430s0001	Marchantia polymorpha	GNA
Mapoly0557s0001	Marchantia polymorpha	GNA
Mapoly0898s0001	Marchantia polymorpha	GNA
Mapoly1233s0001	Marchantia polymorpha	GNA
Mapoly1717s0001	Marchantia polymorpha	GNA
Mapoly2118s0001	Marchantia polymorpha	GNA
Mapoly0044s0030	Marchantia polymorpha	hevein
Mapoly0057s0079	Marchantia polymorpha	hevein
Mapoly0066s0038	Marchantia polymorpha	hevein
Mapoly0069s0089	Marchantia polymorpha	hevein
Mapoly0069s0092	Marchantia polymorpha	hevein
Mapoly0092s0054	Marchantia polymorpha	hevein
Mapoly0098s0022	Marchantia polymorpha	hevein
Mapoly0103s0065	Marchantia polymorpha	hevein
Mapoly0116s0045	Marchantia polymorpha	hevein
Mapoly0116s0046	Marchantia polymorpha	hevein
Mapoly0116s0048	Marchantia polymorpha	hevein
Mapoly0123s0006	Marchantia polymorpha	hevein
Mapoly0123s0007	Marchantia polymorpha	hevein
Mapoly0196s0008	Marchantia polymorpha	hevein
Mapoly0218s0010	Marchantia polymorpha	hevein
Mapoly0307s0001	Marchantia polymorpha	hevein
Mapoly0307s0002	Marchantia polymorpha	hevein
Mapoly0307s0003	Marchantia polymorpha	hevein
Mapoly0535s0001	Marchantia polymorpha	hevein
Mapoly0535s0002	Marchantia polymorpha	hevein
Mapoly0001s0098	Marchantia polymorpha	legume lectin
Mapoly0004s0002	Marchantia polymorpha	legume lectin
Mapoly0004s0003	Marchantia polymorpha	legume lectin
Mapoly0006s0118	Marchantia polymorpha	legume lectin
Mapoly0006s0120	Marchantia polymorpha	legume lectin
Mapoly0006s0122	Marchantia polymorpha	legume lectin
Mapoly0007s0126	Marchantia polymorpha	legume lectin
Mapoly0022s0080	Marchantia polymorpha	legume lectin
Mapoly0027s0027	Marchantia polymorpha	legume lectin
Mapoly0027s0054	Marchantia polymorpha	legume lectin
Mapoly0027s0055	Marchantia polymorpha	legume lectin
Mapoly0027s0056	Marchantia polymorpha	legume lectin
Mapoly0027s0058	Marchantia polymorpha	legume lectin
Mapoly0027s0060	Marchantia polymorpha	legume lectin
Mapoly0027s0061	Marchantia polymorpha	legume lectin
Mapoly0027s0064	Marchantia polymorpha	legume lectin
Mapoly0034s0124	Marchantia polymorpha	legume lectin
Mapoly0034s0139	Marchantia polymorpha	legume lectin
Mapoly0036s0120	Marchantia polymorpha	legume lectin
Mapoly0039s0119	Marchantia polymorpha	legume lectin
Mapoly0047s0109	Marchantia polymorpha	legume lectin
Mapoly0071s0094	Marchantia polymorpha	legume lectin
Mapoly0090s0085	Marchantia polymorpha	legume lectin
Mapoly0090s0086	Marchantia polymorpha	legume lectin
Mapoly0092s0075	Marchantia polymorpha	legume lectin
Mapoly0095s0026	Marchantia polymorpha	legume lectin
Mapoly0100s0003	Marchantia polymorpha	legume lectin
Mapoly0120s0053	Marchantia polymorpha	legume lectin
Mapoly0121s0013	Marchantia polymorpha	legume lectin
Mapoly0122s0039	Marchantia polymorpha	legume lectin
Mapoly0126s0007	Marchantia polymorpha	legume lectin
Mapoly0144s0017	Marchantia polymorpha	legume lectin
Mapoly0160s0026	Marchantia polymorpha	legume lectin
Mapoly0163s0009	Marchantia polymorpha	legume lectin
Mapoly0197s0020	Marchantia polymorpha	legume lectin
Mapoly0219s0001	Marchantia polymorpha	legume lectin
Mapoly0261s0001	Marchantia polymorpha	legume lectin
Mapoly1887s0001	Marchantia polymorpha	legume lectin
Mapoly4159s0001	Marchantia polymorpha	legume lectin
Mapoly0003s0143	Marchantia polymorpha	lysM
Mapoly0008s0038	Marchantia polymorpha	lysM
Mapoly0008s0249	Marchantia polymorpha	lysM
Mapoly0010s0214	Marchantia polymorpha	lysM
Mapoly0012s0163	Marchantia polymorpha	lysM
Mapoly0025s0092	Marchantia polymorpha	lysM
Mapoly0040s0119	Marchantia polymorpha	lysM
Mapoly0059s0074	Marchantia polymorpha	lysM
Mapoly0060s0010	Marchantia polymorpha	lysM
Mapoly0060s0075	Marchantia polymorpha	lysM
Mapoly0080s0051	Marchantia polymorpha	lysM
Mapoly0089s0038	Marchantia polymorpha	lysM
Mapoly0117s0050	Marchantia polymorpha	lysM
Mapoly0123s0036	Marchantia polymorpha	lysM
Mapoly0007s0161	Marchantia polymorpha	Nictaba
Mapoly0012s0152	Marchantia polymorpha	Nictaba
Mapoly0022s0146	Marchantia polymorpha	Nictaba
Mapoly0024s0070	Marchantia polymorpha	Nictaba
Mapoly0036s0061	Marchantia polymorpha	Nictaba
Mapoly0036s0062	Marchantia polymorpha	Nictaba
Mapoly0036s0064	Marchantia polymorpha	Nictaba
Mapoly0036s0066	Marchantia polymorpha	Nictaba
Mapoly0036s0068	Marchantia polymorpha	Nictaba
Mapoly0036s0069	Marchantia polymorpha	Nictaba
Mapoly0069s0033	Marchantia polymorpha	Nictaba
Mapoly0098s0032	Marchantia polymorpha	Malectin
Mapoly0036s0099	Marchantia polymorpha	Malectin
Mapoly0044s0045	Marchantia polymorpha	Malectin
Mapoly0139s0015	Marchantia polymorpha	Malectin
Mapoly0056s0144	Marchantia polymorpha	Malectin
Mapoly0005s0109	Marchantia polymorpha	Malectin
Mapoly0013s0069	Marchantia polymorpha	Malectin
Mapoly0005s0099	Marchantia polymorpha	Malectin
Mapoly0172s0001	Marchantia polymorpha	Malectin
Mapoly0987s0001	Marchantia polymorpha	Malectin
Mapoly0228s0004	Marchantia polymorpha	Malectin
Mapoly0785s0001	Marchantia polymorpha	Malectin
Mapoly0170s0039	Marchantia polymorpha	Malectin
Mapoly0265s0002	Marchantia polymorpha	Malectin
Mapoly0037s0073	Marchantia polymorpha	Malectin
Mapoly0008s0165	Marchantia polymorpha	Malectin
Mapoly0005s0100	Marchantia polymorpha	Malectin
Mapoly0869s0001	Marchantia polymorpha	Malectin
Mapoly1026s0001	Marchantia polymorpha	Malectin
Mapoly0005s0103	Marchantia polymorpha	Malectin
Mapoly0096s0042	Marchantia polymorpha	Malectin
Mapoly0041s0119	Marchantia polymorpha	Malectin
Mapoly0184s0003	Marchantia polymorpha	Malectin
Mapoly0010s0134	Marchantia polymorpha	Malectin
Mapoly0001s0111	Marchantia polymorpha	Malectin
Mapoly0145s0033	Marchantia polymorpha	Malectin
Mapoly0643s0001	Marchantia polymorpha	Malectin
Mapoly0145s0030	Marchantia polymorpha	Malectin
Mapoly0056s0145	Marchantia polymorpha	Malectin
Mapoly0043s0115	Marchantia polymorpha	Malectin
Mapoly0094s0018	Marchantia polymorpha	Malectin
Mapoly0885s0001	Marchantia polymorpha	Malectin
Mapoly1289s0001	Marchantia polymorpha	Malectin
Mapoly0031s0071	Marchantia polymorpha	Malectin
Mapoly0011s0079	Marchantia polymorpha	Malectin
Mapoly0959s0001	Marchantia polymorpha	Malectin
Mapoly0145s0032	Marchantia polymorpha	Malectin
Mapoly0265s0001	Marchantia polymorpha	Malectin
Mapoly0247s0001	Marchantia polymorpha	Malectin
Mapoly0010s0135	Marchantia polymorpha	Malectin
Mapoly0115s0009	Marchantia polymorpha	Malectin
Mapoly0041s0120	Marchantia polymorpha	Malectin
Mapoly0001s0508	Marchantia polymorpha	Malectin
Mapoly2438s0001	Marchantia polymorpha	Malectin
Mapoly0001s0381	Marchantia polymorpha	Ricin B
Mapoly0013s0131	Marchantia polymorpha	Ricin B
Mapoly0033s0125	Marchantia polymorpha	Ricin B
Mapoly0072s0088	Marchantia polymorpha	Ricin B
Mapoly0076s0087	Marchantia polymorpha	Ricin B
Mapoly0085s0085	Marchantia polymorpha	Ricin B
Mapoly0103s0041	Marchantia polymorpha	Ricin B
Mapoly0137s0004	Marchantia polymorpha	Ricin B
Mapoly0137s0005	Marchantia polymorpha	Ricin B
Mapoly0137s0006	Marchantia polymorpha	Ricin B
Mapoly0167s0005	Marchantia polymorpha	Ricin B
Mapoly0255s0001	Marchantia polymorpha	Ricin B
Sphfalx0134s0005	Sphagnum fallax	Agaricus bisporus agglutinin
Sphfalx0134s0006	Sphagnum fallax	Agaricus bisporus agglutinin
Sphfalx0151s0054	Sphagnum fallax	Agaricus bisporus agglutinin
Sphfalx0151s0055	Sphagnum fallax	Agaricus bisporus agglutinin
Sphfalx0271s0006	Sphagnum fallax	Agaricus bisporus agglutinin
Sphfalx0271s0007	Sphagnum fallax	Agaricus bisporus agglutinin
Sphfalx0360s0002	Sphagnum fallax	Agaricus bisporus agglutinin
Sphfalx0360s0008	Sphagnum fallax	Agaricus bisporus agglutinin
Sphfalx0466s0003	Sphagnum fallax	Agaricus bisporus agglutinin
Sphfalx0557s0002	Sphagnum fallax	Agaricus bisporus agglutinin
Sphfalx0052s0011	Sphagnum fallax	cyanovirin
Sphfalx0193s0009	Sphagnum fallax	cyanovirin
Sphfalx0196s0040	Sphagnum fallax	cyanovirin
Sphfalx0207s0002	Sphagnum fallax	cyanovirin
Sphfalx0207s0003	Sphagnum fallax	cyanovirin
Sphfalx0207s0005	Sphagnum fallax	cyanovirin
Sphfalx0207s0006	Sphagnum fallax	cyanovirin
Sphfalx0207s0007	Sphagnum fallax	cyanovirin
Sphfalx0207s0008	Sphagnum fallax	cyanovirin
Sphfalx0207s0009	Sphagnum fallax	cyanovirin
Sphfalx0207s0010	Sphagnum fallax	cyanovirin
Sphfalx0275s0018	Sphagnum fallax	cyanovirin
Sphfalx0275s0019	Sphagnum fallax	cyanovirin
Sphfalx0287s0016	Sphagnum fallax	cyanovirin
Sphfalx0308s0011	Sphagnum fallax	cyanovirin
Sphfalx0504s0001	Sphagnum fallax	cyanovirin
Sphfalx0000s0746	Sphagnum fallax	EUL
Sphfalx0007s0190	Sphagnum fallax	GNA
Sphfalx0007s0192	Sphagnum fallax	GNA
Sphfalx0008s0037	Sphagnum fallax	GNA
Sphfalx0012s0162	Sphagnum fallax	GNA
Sphfalx0012s0165	Sphagnum fallax	GNA
Sphfalx0012s0167	Sphagnum fallax	GNA
Sphfalx0012s0170	Sphagnum fallax	GNA
Sphfalx0012s0171	Sphagnum fallax	GNA
Sphfalx0014s0262	Sphagnum fallax	GNA
Sphfalx0025s0043	Sphagnum fallax	GNA
Sphfalx0027s0121	Sphagnum fallax	GNA
Sphfalx0027s0122	Sphagnum fallax	GNA
Sphfalx0096s0005	Sphagnum fallax	GNA
Sphfalx0108s0003	Sphagnum fallax	GNA
Sphfalx0109s0090	Sphagnum fallax	GNA
Sphfalx0128s0065	Sphagnum fallax	GNA
Sphfalx0128s0070	Sphagnum fallax	GNA
Sphfalx0207s0014	Sphagnum fallax	GNA
Sphfalx0207s0016	Sphagnum fallax	GNA
Sphfalx0223s0001	Sphagnum fallax	GNA
Sphfalx0223s0002	Sphagnum fallax	GNA
Sphfalx0223s0005	Sphagnum fallax	GNA
Sphfalx0223s0007	Sphagnum fallax	GNA
Sphfalx0223s0008	Sphagnum fallax	GNA
Sphfalx0238s0033	Sphagnum fallax	GNA
Sphfalx0271s0009	Sphagnum fallax	GNA
Sphfalx0306s0004	Sphagnum fallax	GNA
Sphfalx0340s0001	Sphagnum fallax	GNA
Sphfalx0340s0004	Sphagnum fallax	GNA
Sphfalx0340s0006	Sphagnum fallax	GNA
Sphfalx0400s0002	Sphagnum fallax	GNA
Sphfalx0476s0002	Sphagnum fallax	GNA
Sphfalx0483s0001	Sphagnum fallax	GNA
Sphfalx0483s0002	Sphagnum fallax	GNA
Sphfalx0010s0023	Sphagnum fallax	hevein
Sphfalx0020s0219	Sphagnum fallax	hevein
Sphfalx0020s0220	Sphagnum fallax	hevein
Sphfalx0020s0223	Sphagnum fallax	hevein
Sphfalx0020s0225	Sphagnum fallax	hevein
Sphfalx0058s0082	Sphagnum fallax	hevein
Sphfalx0068s0071	Sphagnum fallax	hevein
Sphfalx0074s0105	Sphagnum fallax	hevein
Sphfalx0074s0107	Sphagnum fallax	hevein
Sphfalx0000s0338	Sphagnum fallax	jacalin
Sphfalx0007s0188	Sphagnum fallax	jacalin
Sphfalx0009s0003	Sphagnum fallax	jacalin
Sphfalx0022s0035	Sphagnum fallax	jacalin
Sphfalx0026s0038	Sphagnum fallax	jacalin
Sphfalx0042s0151	Sphagnum fallax	jacalin
Sphfalx0042s0152	Sphagnum fallax	jacalin
Sphfalx0085s0093	Sphagnum fallax	jacalin
Sphfalx0102s0006	Sphagnum fallax	jacalin
Sphfalx0105s0002	Sphagnum fallax	jacalin
Sphfalx0105s0065	Sphagnum fallax	jacalin
Sphfalx0105s0068	Sphagnum fallax	jacalin
Sphfalx0105s0070	Sphagnum fallax	jacalin
Sphfalx0109s0040	Sphagnum fallax	jacalin
Sphfalx0144s0001	Sphagnum fallax	jacalin
Sphfalx0144s0003	Sphagnum fallax	jacalin
Sphfalx0144s0006	Sphagnum fallax	jacalin
Sphfalx0318s0001	Sphagnum fallax	jacalin
Sphfalx0375s0001	Sphagnum fallax	jacalin
Sphfalx0376s0005	Sphagnum fallax	jacalin
Sphfalx0376s0007	Sphagnum fallax	jacalin
Sphfalx0382s0006	Sphagnum fallax	jacalin
Sphfalx0382s0007	Sphagnum fallax	jacalin
Sphfalx0450s0002	Sphagnum fallax	jacalin
Sphfalx0450s0003	Sphagnum fallax	jacalin
Sphfalx0471s0006	Sphagnum fallax	jacalin
Sphfalx0481s0002	Sphagnum fallax	jacalin
Sphfalx0507s0005	Sphagnum fallax	jacalin
Sphfalx0550s0001	Sphagnum fallax	jacalin
Sphfalx0705s0001	Sphagnum fallax	jacalin
Sphfalx0000s0070	Sphagnum fallax	legume lectin
Sphfalx0021s0051	Sphagnum fallax	legume lectin
Sphfalx0029s0136	Sphagnum fallax	legume lectin
Sphfalx0033s0042	Sphagnum fallax	legume lectin
Sphfalx0033s0135	Sphagnum fallax	legume lectin
Sphfalx0061s0025	Sphagnum fallax	legume lectin
Sphfalx0064s0081	Sphagnum fallax	legume lectin
Sphfalx0067s0025	Sphagnum fallax	legume lectin
Sphfalx0077s0013	Sphagnum fallax	legume lectin
Sphfalx0099s0060	Sphagnum fallax	legume lectin
Sphfalx0126s0068	Sphagnum fallax	legume lectin
Sphfalx0126s0071	Sphagnum fallax	legume lectin
Sphfalx0126s0075	Sphagnum fallax	legume lectin
Sphfalx0174s0021	Sphagnum fallax	legume lectin
Sphfalx0181s0035	Sphagnum fallax	legume lectin
Sphfalx0181s0039	Sphagnum fallax	legume lectin
Sphfalx0181s0041	Sphagnum fallax	legume lectin
Sphfalx0181s0043	Sphagnum fallax	legume lectin
Sphfalx0210s0013	Sphagnum fallax	legume lectin
Sphfalx0210s0014	Sphagnum fallax	legume lectin
Sphfalx0210s0016	Sphagnum fallax	legume lectin
Sphfalx0210s0017	Sphagnum fallax	legume lectin
Sphfalx0210s0018	Sphagnum fallax	legume lectin
Sphfalx0210s0019	Sphagnum fallax	legume lectin
Sphfalx0210s0020	Sphagnum fallax	legume lectin
Sphfalx0210s0021	Sphagnum fallax	legume lectin
Sphfalx0210s0022	Sphagnum fallax	legume lectin
Sphfalx0225s0025	Sphagnum fallax	legume lectin
Sphfalx0311s0001	Sphagnum fallax	legume lectin
Sphfalx0311s0008	Sphagnum fallax	legume lectin
Sphfalx0322s0010	Sphagnum fallax	legume lectin
Sphfalx0348s0013	Sphagnum fallax	legume lectin
Sphfalx0399s0002	Sphagnum fallax	legume lectin
Sphfalx0006s0168	Sphagnum fallax	LysM
Sphfalx0009s0036	Sphagnum fallax	LysM
Sphfalx0012s0063	Sphagnum fallax	LysM
Sphfalx0013s0086	Sphagnum fallax	LysM
Sphfalx0016s0162	Sphagnum fallax	LysM
Sphfalx0020s0254	Sphagnum fallax	LysM
Sphfalx0024s0164	Sphagnum fallax	LysM
Sphfalx0029s0174	Sphagnum fallax	LysM
Sphfalx0045s0110	Sphagnum fallax	LysM
Sphfalx0053s0128	Sphagnum fallax	LysM
Sphfalx0055s0073	Sphagnum fallax	LysM
Sphfalx0061s0057	Sphagnum fallax	LysM
Sphfalx0090s0044	Sphagnum fallax	LysM
Sphfalx0100s0069	Sphagnum fallax	LysM
Sphfalx0104s0043	Sphagnum fallax	LysM
Sphfalx0115s0046	Sphagnum fallax	LysM
Sphfalx0137s0020	Sphagnum fallax	LysM
Sphfalx0154s0055	Sphagnum fallax	LysM
Sphfalx0158s0055	Sphagnum fallax	LysM
Sphfalx0159s0001	Sphagnum fallax	LysM
Sphfalx0159s0002	Sphagnum fallax	LysM
Sphfalx0159s0035	Sphagnum fallax	LysM
Sphfalx0216s0020	Sphagnum fallax	LysM
Sphfalx0220s0034	Sphagnum fallax	LysM
Sphfalx0232s0013	Sphagnum fallax	LysM
Sphfalx0261s0013	Sphagnum fallax	LysM
Sphfalx0289s0001	Sphagnum fallax	LysM
Sphfalx0479s0001	Sphagnum fallax	LysM
Sphfalx0005s0010	Sphagnum fallax	Nictaba
Sphfalx0022s0154	Sphagnum fallax	Nictaba
Sphfalx0038s0034	Sphagnum fallax	Nictaba
Sphfalx0054s0111	Sphagnum fallax	Nictaba
Sphfalx0090s0092	Sphagnum fallax	Nictaba
Sphfalx0123s0005	Sphagnum fallax	Nictaba
Sphfalx0203s0006	Sphagnum fallax	Nictaba
Sphfalx0271s0029	Sphagnum fallax	Nictaba
Sphfalx0276s0007	Sphagnum fallax	Nictaba
Sphfalx0333s0010	Sphagnum fallax	Nictaba
Sphfalx0341s0009	Sphagnum fallax	Nictaba
Sphfalx0254s0019	Sphagnum fallax	Ricin B
Sphfalx0000s0345	Sphagnum fallax	Malectin
Sphfalx0005s0355	Sphagnum fallax	Malectin
Sphfalx0006s0330	Sphagnum fallax	Malectin
Sphfalx0034s0136	Sphagnum fallax	Malectin
Sphfalx0034s0141	Sphagnum fallax	Malectin
Sphfalx0037s0081	Sphagnum fallax	Malectin
Sphfalx0048s0045	Sphagnum fallax	Malectin
Sphfalx0050s0005	Sphagnum fallax	Malectin
Sphfalx0056s0122	Sphagnum fallax	Malectin
Sphfalx0065s0129	Sphagnum fallax	Malectin
Sphfalx0087s0079	Sphagnum fallax	Malectin
Sphfalx0109s0088	Sphagnum fallax	Malectin
Sphfalx0173s0012	Sphagnum fallax	Malectin
Sphfalx0181s0007	Sphagnum fallax	Malectin
Sphfalx0321s0017	Sphagnum fallax	Malectin
Sphfalx0001s0166	Sphagnum fallax	Malectin
Sphfalx0002s0256	Sphagnum fallax	Malectin
Sphfalx0002s0259	Sphagnum fallax	Malectin
Sphfalx0006s0142	Sphagnum fallax	Malectin
Sphfalx0015s0237	Sphagnum fallax	Malectin
Sphfalx0015s0239	Sphagnum fallax	Malectin
Sphfalx0016s0100	Sphagnum fallax	Malectin
Sphfalx0019s0081	Sphagnum fallax	Malectin
Sphfalx0021s0175	Sphagnum fallax	Malectin
Sphfalx0021s0182	Sphagnum fallax	Malectin
Sphfalx0022s0006	Sphagnum fallax	Malectin
Sphfalx0024s0001	Sphagnum fallax	Malectin
Sphfalx0024s0002	Sphagnum fallax	Malectin
Sphfalx0027s0162	Sphagnum fallax	Malectin
Sphfalx0028s0088	Sphagnum fallax	Malectin
Sphfalx0037s0029	Sphagnum fallax	Malectin
Sphfalx0037s0034	Sphagnum fallax	Malectin
Sphfalx0042s0156	Sphagnum fallax	Malectin
Sphfalx0043s0099	Sphagnum fallax	Malectin
Sphfalx0043s0100	Sphagnum fallax	Malectin
Sphfalx0048s0077	Sphagnum fallax	Malectin
Sphfalx0048s0079	Sphagnum fallax	Malectin
Sphfalx0050s0001	Sphagnum fallax	Malectin
Sphfalx0050s0003	Sphagnum fallax	Malectin
Sphfalx0050s0004	Sphagnum fallax	Malectin
Sphfalx0053s0147	Sphagnum fallax	Malectin
Sphfalx0053s0151	Sphagnum fallax	Malectin
Sphfalx0056s0104	Sphagnum fallax	Malectin
Sphfalx0071s0079	Sphagnum fallax	Malectin
Sphfalx0084s0004	Sphagnum fallax	Malectin
Sphfalx0084s0006	Sphagnum fallax	Malectin
Sphfalx0099s0075	Sphagnum fallax	Malectin
Sphfalx0103s0050	Sphagnum fallax	Malectin
Sphfalx0109s0070	Sphagnum fallax	Malectin
Sphfalx0115s0056	Sphagnum fallax	Malectin
Sphfalx0115s0058	Sphagnum fallax	Malectin
Pp3c15_13210	Physcomitrella patens	cyanovirin
Pp3c13_11160	Physcomitrella patens	EUL
Pp3c3_10250	Physcomitrella patens	EUL
Pp3c26_13000	Physcomitrella patens	EUL
Pp3c3_21990	Physcomitrella patens	EUL
Pp3c1_22880	Physcomitrella patens	GNA
Pp3c16_21640	Physcomitrella patens	GNA
Pp3c20_6870	Physcomitrella patens	GNA
Pp3c21_16810	Physcomitrella patens	GNA
Pp3c22_1330	Physcomitrella patens	GNA
Pp3c22_22820	Physcomitrella patens	GNA
Pp3c23_9750	Physcomitrella patens	GNA
Pp3c4_27350	Physcomitrella patens	GNA
Pp3c6_6060	Physcomitrella patens	GNA
Pp3c8_4810	Physcomitrella patens	GNA
Pp3c8_4920	Physcomitrella patens	GNA
Pp3c10_12040	Physcomitrella patens	GNA
Pp3c21_15660	Physcomitrella patens	GNA
Pp3c3_37560	Physcomitrella patens	GNA
Pp3c24_9300	Physcomitrella patens	GNA
Pp3c10_19680	Physcomitrella patens	GNA
Pp3c1_30410	Physcomitrella patens	hevein
Pp3c11_1420	Physcomitrella patens	hevein
Pp3c13_20039	Physcomitrella patens	hevein
Pp3c16_13440	Physcomitrella patens	hevein
Pp3c16_17090	Physcomitrella patens	hevein
Pp3c24_15000	Physcomitrella patens	hevein
Pp3c6_130	Physcomitrella patens	hevein
Pp3c6_90	Physcomitrella patens	hevein
Pp3c7_25120	Physcomitrella patens	hevein
Pp3c8_13540	Physcomitrella patens	hevein
Pp3c8_13570	Physcomitrella patens	hevein
Pp3c8_22560	Physcomitrella patens	hevein
Pp3c1_1940	Physcomitrella patens	jacalin
Pp3c10_150	Physcomitrella patens	jacalin
Pp3c18_9170	Physcomitrella patens	jacalin
Pp3c18_9180	Physcomitrella patens	jacalin
Pp3c2_180	Physcomitrella patens	jacalin
Pp3c21_60	Physcomitrella patens	jacalin
Pp3c22_19230	Physcomitrella patens	jacalin
Pp3c22_19310	Physcomitrella patens	jacalin
Pp3c3_12730	Physcomitrella patens	jacalin
Pp3c14_400	Physcomitrella patens	jacalin
Pp3c1_13200	Physcomitrella patens	legume lectin
Pp3c10_6460	Physcomitrella patens	legume lectin
Pp3c11_8850	Physcomitrella patens	legume lectin
Pp3c12_25650	Physcomitrella patens	legume lectin
Pp3c14_150	Physcomitrella patens	legume lectin
Pp3c2_24490	Physcomitrella patens	legume lectin
Pp3c2_34580	Physcomitrella patens	legume lectin
Pp3c2_34620	Physcomitrella patens	legume lectin
Pp3c21_20280	Physcomitrella patens	legume lectin
Pp3c5_17880	Physcomitrella patens	legume lectin
Pp3c1_21480V3.1	Physcomitrella patens	LysM
Pp3c1_33030V3.1	Physcomitrella patens	LysM
Pp3c1_6050V3.1	Physcomitrella patens	LysM
Pp3c10_7581V3.1	Physcomitrella patens	LysM
Pp3c13_19830V3.1	Physcomitrella patens	LysM
Pp3c14_19400V3.1	Physcomitrella patens	LysM
Pp3c16_23250V3.1	Physcomitrella patens	LysM
Pp3c16_5370V3.1	Physcomitrella patens	LysM
Pp3c18_21840V3.1	Physcomitrella patens	LysM
Pp3c2_19990V3.1	Physcomitrella patens	LysM
Pp3c2_37160V3.1	Physcomitrella patens	LysM
Pp3c2_4650V3.1	Physcomitrella patens	LysM
Pp3c21_17920V3.11	Physcomitrella patens	LysM
Pp3c22_17850V3.1	Physcomitrella patens	LysM
Pp3c22_5700V3.1	Physcomitrella patens	LysM
Pp3c27_2280V3.1	Physcomitrella patens	LysM
Pp3c3_11780V3.1	Physcomitrella patens	LysM
Pp3c3_29480V3.1	Physcomitrella patens	LysM
Pp3c4_3190V3.1	Physcomitrella patens	LysM
Pp3c5_17160V3.1	Physcomitrella patens	LysM
Pp3c5_4120V3.1	Physcomitrella patens	LysM
Pp3c5_4140V3.1	Physcomitrella patens	LysM
Pp3c6_920V3.1	Physcomitrella patens	LysM
Pp3c7_23420V3.1	Physcomitrella patens	LysM
Pp3c7_25560V3.1	Physcomitrella patens	LysM
Pp3c7_26350V3.	Physcomitrella patens	LysM
Pp3c9_5820V3.	Physcomitrella patens	LysM
Pp3c9_6180V3.1	Physcomitrella patens	LysM
Pp3s155_60V3.1	Physcomitrella patens	LysM
Pp3c11_3260V3.1	Physcomitrella patens	LysM
Pp3c15_20580V3.1	Physcomitrella patens	LysM
Pp3c16_11450V3.1	Physcomitrella patens	Nictaba
Pp3c19_22630V3.1	Physcomitrella patens	Nictaba
Pp3c24_14280V3.1	Physcomitrella patens	Nictaba
Pp3c26_1510V3.1	Physcomitrella patens	Nictaba
Pp3c1_9180	Physcomitrella patens	Malectin
Pp3c3_28930	Physcomitrella patens	Malectin
Pp3c1_23020	Physcomitrella patens	Malectin
Pp3c27_5920	Physcomitrella patens	Malectin
Pp3c1_23040	Physcomitrella patens	Malectin
Pp3c9_7920	Physcomitrella patens	Malectin
Pp3c3_260	Physcomitrella patens	Malectin
Pp3c4_18510	Physcomitrella patens	Malectin
Pp3c3_25390	Physcomitrella patens	Malectin
Pp3c12_16180	Physcomitrella patens	Malectin
Pp3c2_37290	Physcomitrella patens	Malectin
Pp3c26_12890	Physcomitrella patens	Malectin
Pp3c4_18720	Physcomitrella patens	Malectin
Pp3c4_2350	Physcomitrella patens	Malectin
Pp3c10_2160	Physcomitrella patens	Malectin
Pp3c7_25750	Physcomitrella patens	Malectin
Pp3c16_5720	Physcomitrella patens	Malectin
Pp3c10_1880	Physcomitrella patens	Malectin
Pp3c13_11270	Physcomitrella patens	Malectin
Pp3c4_18360	Physcomitrella patens	Malectin
Pp3c20_17290	Physcomitrella patens	Malectin
Pp3c9_10760	Physcomitrella patens	Malectin
Pp3c9_10730	Physcomitrella patens	Malectin
Pp3c7_20780	Physcomitrella patens	Malectin
Pp3c9_5240	Physcomitrella patens	Malectin
Pp3c15_3950	Physcomitrella patens	Malectin
Pp3c20_16970	Physcomitrella patens	Malectin
Pp3c3_10220	Physcomitrella patens	Malectin
Pp3c4_18780	Physcomitrella patens	Malectin
Pp3c9_10640	Physcomitrella patens	Malectin
Pp3c2_18520	Physcomitrella patens	Malectin
Pp3c15_1540	Physcomitrella patens	Malectin
Pp3c24_13720	Physcomitrella patens	Malectin
Pp3c22_12350	Physcomitrella patens	Malectin
Pp3c19_4590	Physcomitrella patens	Malectin
Pp3c20_5990	Physcomitrella patens	Malectin
Pp3c11_18080	Physcomitrella patens	Ricin B
402373	Selaginella moellendorffii	amaranthin
424555	Selaginella moellendorffii	amaranthin
404848	Selaginella moellendorffii	cyanovirin
406066	Selaginella moellendorffii	cyanovirin
406500	Selaginella moellendorffii	cyanovirin
409744	Selaginella moellendorffii	cyanovirin
411931	Selaginella moellendorffii	cyanovirin
413929	Selaginella moellendorffii	cyanovirin
413954	Selaginella moellendorffii	cyanovirin
413955	Selaginella moellendorffii	cyanovirin
415071	Selaginella moellendorffii	cyanovirin
415563	Selaginella moellendorffii	cyanovirin
421559	Selaginella moellendorffii	cyanovirin
421562	Selaginella moellendorffii	cyanovirin
421566	Selaginella moellendorffii	cyanovirin
421569	Selaginella moellendorffii	cyanovirin
422026	Selaginella moellendorffii	cyanovirin
422182	Selaginella moellendorffii	cyanovirin
424600	Selaginella moellendorffii	cyanovirin
428273	Selaginella moellendorffii	cyanovirin
428274	Selaginella moellendorffii	cyanovirin
428470	Selaginella moellendorffii	cyanovirin
429424	Selaginella moellendorffii	cyanovirin
429951	Selaginella moellendorffii	cyanovirin
430413	Selaginella moellendorffii	cyanovirin
437973	Selaginella moellendorffii	cyanovirin
439768	Selaginella moellendorffii	cyanovirin
440525	Selaginella moellendorffii	cyanovirin
442869	Selaginella moellendorffii	cyanovirin
140053	Selaginella moellendorffii	EUL
270227	Selaginella moellendorffii	EUL
6359	Selaginella moellendorffii	GNA
7622	Selaginella moellendorffii	GNA
7677	Selaginella moellendorffii	GNA
8086	Selaginella moellendorffii	GNA
8316	Selaginella moellendorffii	GNA
8435	Selaginella moellendorffii	GNA
15656	Selaginella moellendorffii	GNA
17668	Selaginella moellendorffii	GNA
17751	Selaginella moellendorffii	GNA
17767	Selaginella moellendorffii	GNA
17791	Selaginella moellendorffii	GNA
17893	Selaginella moellendorffii	GNA
18084	Selaginella moellendorffii	GNA
18365	Selaginella moellendorffii	GNA
18695	Selaginella moellendorffii	GNA
18714	Selaginella moellendorffii	GNA
18725	Selaginella moellendorffii	GNA
18995	Selaginella moellendorffii	GNA
19034	Selaginella moellendorffii	GNA
19046	Selaginella moellendorffii	GNA
19074	Selaginella moellendorffii	GNA
19086	Selaginella moellendorffii	GNA
19099	Selaginella moellendorffii	GNA
19115	Selaginella moellendorffii	GNA
19132	Selaginella moellendorffii	GNA
19150	Selaginella moellendorffii	GNA
19151	Selaginella moellendorffii	GNA
19156	Selaginella moellendorffii	GNA
19168	Selaginella moellendorffii	GNA
19170	Selaginella moellendorffii	GNA
19175	Selaginella moellendorffii	GNA
19179	Selaginella moellendorffii	GNA
19211	Selaginella moellendorffii	GNA
19212	Selaginella moellendorffii	GNA
19225	Selaginella moellendorffii	GNA
19240	Selaginella moellendorffii	GNA
19242	Selaginella moellendorffii	GNA
19257	Selaginella moellendorffii	GNA
19258	Selaginella moellendorffii	GNA
19267	Selaginella moellendorffii	GNA
19270	Selaginella moellendorffii	GNA
19271	Selaginella moellendorffii	GNA
19275	Selaginella moellendorffii	GNA
19277	Selaginella moellendorffii	GNA
19280	Selaginella moellendorffii	GNA
19283	Selaginella moellendorffii	GNA
19289	Selaginella moellendorffii	GNA
28051	Selaginella moellendorffii	GNA
28171	Selaginella moellendorffii	GNA
28782	Selaginella moellendorffii	GNA
29034	Selaginella moellendorffii	GNA
29052	Selaginella moellendorffii	GNA
29062	Selaginella moellendorffii	GNA
29066	Selaginella moellendorffii	GNA
29131	Selaginella moellendorffii	GNA
29137	Selaginella moellendorffii	GNA
29219	Selaginella moellendorffii	GNA
29236	Selaginella moellendorffii	GNA
29243	Selaginella moellendorffii	GNA
29248	Selaginella moellendorffii	GNA
29252	Selaginella moellendorffii	GNA
30867	Selaginella moellendorffii	GNA
72382	Selaginella moellendorffii	GNA
72389	Selaginella moellendorffii	GNA
72390	Selaginella moellendorffii	GNA
72392	Selaginella moellendorffii	GNA
73481	Selaginella moellendorffii	GNA
76109	Selaginella moellendorffii	GNA
77831	Selaginella moellendorffii	GNA
77916	Selaginella moellendorffii	GNA
78138	Selaginella moellendorffii	GNA
78440	Selaginella moellendorffii	GNA
78597	Selaginella moellendorffii	GNA
79016	Selaginella moellendorffii	GNA
79266	Selaginella moellendorffii	GNA
81021	Selaginella moellendorffii	GNA
84226	Selaginella moellendorffii	GNA
92399	Selaginella moellendorffii	GNA
93883	Selaginella moellendorffii	GNA
94145	Selaginella moellendorffii	GNA
94634	Selaginella moellendorffii	GNA
99286	Selaginella moellendorffii	GNA
99357	Selaginella moellendorffii	GNA
99665	Selaginella moellendorffii	GNA
105693	Selaginella moellendorffii	GNA
108178	Selaginella moellendorffii	GNA
121264	Selaginella moellendorffii	GNA
123124	Selaginella moellendorffii	GNA
126695	Selaginella moellendorffii	GNA
126716	Selaginella moellendorffii	GNA
134224	Selaginella moellendorffii	GNA
139027	Selaginella moellendorffii	GNA
404398	Selaginella moellendorffii	GNA
405588	Selaginella moellendorffii	GNA
405892	Selaginella moellendorffii	GNA
405893	Selaginella moellendorffii	GNA
405895	Selaginella moellendorffii	GNA
405996	Selaginella moellendorffii	GNA
406093	Selaginella moellendorffii	GNA
406388	Selaginella moellendorffii	GNA
406744	Selaginella moellendorffii	GNA
407256	Selaginella moellendorffii	GNA
407837	Selaginella moellendorffii	GNA
411115	Selaginella moellendorffii	GNA
412593	Selaginella moellendorffii	GNA
413139	Selaginella moellendorffii	GNA
413777	Selaginella moellendorffii	GNA
417150	Selaginella moellendorffii	GNA
417153	Selaginella moellendorffii	GNA
417154	Selaginella moellendorffii	GNA
417616	Selaginella moellendorffii	GNA
417909	Selaginella moellendorffii	GNA
419726	Selaginella moellendorffii	GNA
419730	Selaginella moellendorffii	GNA
420647	Selaginella moellendorffii	GNA
420673	Selaginella moellendorffii	GNA
421870	Selaginella moellendorffii	GNA
424594	Selaginella moellendorffii	GNA
424595	Selaginella moellendorffii	GNA
425850	Selaginella moellendorffii	GNA
426634	Selaginella moellendorffii	GNA
427043	Selaginella moellendorffii	GNA
428400	Selaginella moellendorffii	GNA
428537	Selaginella moellendorffii	GNA
431703	Selaginella moellendorffii	GNA
432040	Selaginella moellendorffii	GNA
432162	Selaginella moellendorffii	GNA
438131	Selaginella moellendorffii	GNA
438187	Selaginella moellendorffii	GNA
438249	Selaginella moellendorffii	GNA
439216	Selaginella moellendorffii	GNA
441910	Selaginella moellendorffii	GNA
444041	Selaginella moellendorffii	GNA
447201	Selaginella moellendorffii	GNA
448668	Selaginella moellendorffii	GNA
35272	Selaginella moellendorffii	Hevein
99416	Selaginella moellendorffii	Hevein
99732	Selaginella moellendorffii	Hevein
125663	Selaginella moellendorffii	Hevein
126203	Selaginella moellendorffii	Hevein
139127	Selaginella moellendorffii	Hevein
403798	Selaginella moellendorffii	Hevein
425957	Selaginella moellendorffii	Hevein
437354	Selaginella moellendorffii	Hevein
443112	Selaginella moellendorffii	Hevein
446851	Selaginella moellendorffii	Hevein
17953	Selaginella moellendorffii	Jacalin
410408	Selaginella moellendorffii	Jacalin
410639	Selaginella moellendorffii	Jacalin
411518	Selaginella moellendorffii	Jacalin
414098	Selaginella moellendorffii	Jacalin
414661	Selaginella moellendorffii	Jacalin
416970	Selaginella moellendorffii	Jacalin
421303	Selaginella moellendorffii	Jacalin
424757	Selaginella moellendorffii	Jacalin
441276	Selaginella moellendorffii	Jacalin
15696	Selaginella moellendorffii	legume lectin
30228	Selaginella moellendorffii	legume lectin
31279	Selaginella moellendorffii	legume lectin
41933	Selaginella moellendorffii	legume lectin
61771	Selaginella moellendorffii	legume lectin
82090	Selaginella moellendorffii	legume lectin
109282	Selaginella moellendorffii	legume lectin
135805	Selaginella moellendorffii	legume lectin
172624	Selaginella moellendorffii	legume lectin
414515	Selaginella moellendorffii	legume lectin
438534	Selaginella moellendorffii	legume lectin
11327	Selaginella moellendorffii	LysM
21370	Selaginella moellendorffii	LysM
31503	Selaginella moellendorffii	LysM
65369	Selaginella moellendorffii	LysM
89593	Selaginella moellendorffii	LysM
111811	Selaginella moellendorffii	LysM
166787	Selaginella moellendorffii	LysM
416289	Selaginella moellendorffii	LysM
421511	Selaginella moellendorffii	LysM
426628	Selaginella moellendorffii	LysM
438100	Selaginella moellendorffii	LysM
438181	Selaginella moellendorffii	LysM
438219	Selaginella moellendorffii	LysM
443457	Selaginella moellendorffii	LysM
443644	Selaginella moellendorffii	LysM
446318	Selaginella moellendorffii	LysM
35818	Selaginella moellendorffii	Nictaba
116437	Selaginella moellendorffii	Nictaba
271662	Selaginella moellendorffii	Nictaba
SMO117G0082	Selaginella moellendorffii	Malectin
SMO096G0001	Selaginella moellendorffii	Malectin
SMO364G0096	Selaginella moellendorffii	Malectin
SMO356G0175	Selaginella moellendorffii	Malectin
SMO146G0279	Selaginella moellendorffii	Malectin
SMO250G0005	Selaginella moellendorffii	Malectin
SMO365G0033	Selaginella moellendorffii	Malectin
SMO364G0747	Selaginella moellendorffii	Malectin
SMO259G0037	Selaginella moellendorffii	Malectin
148346	Selaginella moellendorffii	Ricin B
437633	Selaginella moellendorffii	Ricin B
Azfi_s0105.g044947	Azolla filiculoides	amaranthin
Azfi_s0105.g044956	Azolla filiculoides	amaranthin
Azfi_s0002.g001158	Azolla filiculoides	cyanovirin
Azfi_s0050.g030981	Azolla filiculoides	cyanovirin
Azfi_s0015.g014069	Azolla filiculoides	EUL
Azfi_s0054.g033715	Azolla filiculoides	EUL
Azfi_s0001.g000760	Azolla filiculoides	Hevein
Azfi_s0001.g000746	Azolla filiculoides	Hevein
Azfi_s0001.g000750	Azolla filiculoides	Hevein
Azfi_s0001.g000767	Azolla filiculoides	Hevein
Azfi_s0001.g000738	Azolla filiculoides	Hevein
Azfi_s0001.g000754	Azolla filiculoides	Hevein
Azfi_s0001.g000752	Azolla filiculoides	Hevein
Azfi_s0109.g045368	Azolla filiculoides	legume lectin
Azfi_s0013.g013078	Azolla filiculoides	legume lectin
Azfi_s0107.g045112	Azolla filiculoides	legume lectin
Azfi_s0632.g080167	Azolla filiculoides	legume lectin
Azfi_s0104.g044863	Azolla filiculoides	legume lectin
Azfi_s0040.g026589	Azolla filiculoides	legume lectin
Azfi_s0475.g073007	Azolla filiculoides	legume lectin
Azfi_s0602.g078920	Azolla filiculoides	legume lectin
Azfi_s0016.g014234	Azolla filiculoides	legume lectin
Azfi_s0818.g087981	Azolla filiculoides	legume lectin
Azfi_s0172.g055699	Azolla filiculoides	legume lectin
Azfi_s0006.g009529	Azolla filiculoides	legume lectin
Azfi_s0006.g009524	Azolla filiculoides	legume lectin
Azfi_s0114.g046167	Azolla filiculoides	legume lectin
Azfi_s0065.g035912	Azolla filiculoides	legume lectin
Azfi_s0094.g043480	Azolla filiculoides	legume lectin
Azfi_s1158.g098525	Azolla filiculoides	legume lectin
Azfi_s0094.g043484	Azolla filiculoides	legume lectin
Azfi_s0054.g033743	Azolla filiculoides	legume lectin
Azfi_s0094.g043476	Azolla filiculoides	legume lectin
Azfi_s0001.g000444	Azolla filiculoides	legume lectin
Azfi_s0322.g064522	Azolla filiculoides	Nictaba
Azfi_s0405.g068386	Azolla filiculoides	Nictaba
Azfi_s2399.g111181	Azolla filiculoides	Nictaba
Azfi_s0322.g064518	Azolla filiculoides	Nictaba
Azfi_s0229.g059124	Azolla filiculoides	Nictaba
Azfi_s0004.g008570	Azolla filiculoides	Malectin
Azfi_s0010.g012059	Azolla filiculoides	Malectin
Azfi_s0093.g043235	Azolla filiculoides	Malectin
Azfi_s0014.g013670	Azolla filiculoides	Malectin
Azfi_s0113.g045965	Azolla filiculoides	Malectin
Azfi_s0109.g045393	Azolla filiculoides	Malectin
Azfi_s0109.g045405	Azolla filiculoides	Malectin
Azfi_s0109.g045396	Azolla filiculoides	Malectin
Azfi_s0220.g058664	Azolla filiculoides	Malectin
Azfi_s0109.g045397	Azolla filiculoides	Malectin
Azfi_s0001.g001021	Azolla filiculoides	Malectin
Azfi_s0006.g010428	Azolla filiculoides	Ricin B
Azfi_s0215.g058459	Azolla filiculoides	Ricin B
Sacu_v1.1_s0026.g009500	Salvinia cucullata	amaranthin
Sacu_v1.1_s0013.g005921	Salvinia cucullata	cyanovirin
Sacu_v1.1_s0080.g017882	Salvinia cucullata	cyanovirin
Sacu_v1.1_s0128.g021877	Salvinia cucullata	cyanovirin
Sacu_v1.1_s0128.g021876	Salvinia cucullata	cyanovirin
Sacu_v1.1_s0327.g027246	Salvinia cucullata	cyanovirin
Sacu_v1.1_s0001.g000145	Salvinia cucullata	cyanovirin
Sacu_v1.1_s0005.g002721	Salvinia cucullata	cyanovirin
Sacu_v1.1_s0135.g022350	Salvinia cucullata	cyanovirin
Sacu_v1.1_s0191.g025295	Salvinia cucullata	cyanovirin
Sacu_v1.1_s0135.g022356	Salvinia cucullata	cyanovirin
Sacu_v1.1_s0135.g022349	Salvinia cucullata	cyanovirin
Sacu_v1.1_s0017.g007310	Salvinia cucullata	EUL
Sacu_v1.1_s0047.g013505	Salvinia cucullata	EUL
Sacu_v1.1_s0058.g014855	Salvinia cucullata	GNA
Sacu_v1.1_s0029.g010039	Salvinia cucullata	GNA
Sacu_v1.1_s0039.g012167	Salvinia cucullata	GNA
Sacu_v1.1_s0002.g000818	Salvinia cucullata	GNA
Sacu_v1.1_s0059.g015079	Salvinia cucullata	GNA
Sacu_v1.1_s0006.g003408	Salvinia cucullata	legume lectin
Sacu_v1.1_s0159.g023825	Salvinia cucullata	legume lectin
Sacu_v1.1_s0152.g023473	Salvinia cucullata	legume lectin
Sacu_v1.1_s0044.g012992	Salvinia cucullata	legume lectin
Sacu_v1.1_s0187.g025104	Salvinia cucullata	legume lectin
Sacu_v1.1_s0159.g023828	Salvinia cucullata	legume lectin
Sacu_v1.1_s0079.g017802	Salvinia cucullata	legume lectin
Sacu_v1.1_s0258.g026855	Salvinia cucullata	legume lectin
Sacu_v1.1_s0001.g000202	Salvinia cucullata	legume lectin
Sacu_v1.1_s0005.g002883	Salvinia cucullata	legume lectin
Sacu_v1.1_s0087.g018487	Salvinia cucullata	legume lectin
Sacu_v1.1_s0005.g002881	Salvinia cucullata	legume lectin
Sacu_v1.1_s0016.g006866	Salvinia cucullata	legume lectin
Sacu_v1.1_s0016.g006887	Salvinia cucullata	legume lectin
Sacu_v1.1_s0016.g006881	Salvinia cucullata	legume lectin
Sacu_v1.1_s0016.g006916	Salvinia cucullata	legume lectin
Sacu_v1.1_s0012.g005630	Salvinia cucullata	legume lectin
Sacu_v1.1_s0152.g023476	Salvinia cucullata	legume lectin
Sacu_v1.1_s0125.g021686	Salvinia cucullata	legume lectin
Sacu_v1.1_s0059.g015173	Salvinia cucullata	legume lectin
Sacu_v1.1_s0003.g002013	Salvinia cucullata	legume lectin
Sacu_v1.1_s0100.g019713	Salvinia cucullata	legume lectin
Sacu_v1.1_s0016.g006918	Salvinia cucullata	legume lectin
Sacu_v1.1_s0086.g018439	Salvinia cucullata	lysM
Sacu_v1.1_s0127.g021811	Salvinia cucullata	lysM
Sacu_v1.1_s0107.g020388	Salvinia cucullata	lysM
Sacu_v1.1_s0005.g002864	Salvinia cucullata	Nictaba
Sacu_v1.1_s0005.g002865	Salvinia cucullata	Nictaba
Sacu_v1.1_s0134.g022302	Salvinia cucullata	Malectin
Sacu_v1.1_s0024.g009185	Salvinia cucullata	Malectin
Sacu_v1.1_s0014.g006259	Salvinia cucullata	Malectin
Sacu_v1.1_s0008.g004220	Salvinia cucullata	Malectin
Sacu_v1.1_s0251.g026764	Salvinia cucullata	Malectin
Sacu_v1.1_s0083.g018162	Salvinia cucullata	Malectin
Sacu_v1.1_s0005.g002766	Salvinia cucullata	Malectin
Sacu_v1.1_s0180.g024806	Salvinia cucullata	Malectin
Sacu_v1.1_s0055.g014350	Salvinia cucullata	Malectin
Sacu_v1.1_s0205.g025734	Salvinia cucullata	Malectin
Sacu_v1.1_s0093.g018991	Salvinia cucullata	Malectin
Sacu_v1.1_s0143.g022886	Salvinia cucullata	Ricin B
Sacu_v1.1_s0020.g008042	Salvinia cucullata	Ricin B
PAB00033140	Picea abies	amaranthin
PAB00065918	Picea abies	amaranthin
PAB00014911	Picea abies	EUL
PAB00066241	Picea abies	EUL
PAB00036565	Picea abies	EUL
PAB00060465	Picea abies	EUL
PAB00014910	Picea abies	EUL
PAB00049373	Picea abies	EUL
PAB00004400	Picea abies	EUL
PAB00027625	Picea abies	GNA
PAB00016684	Picea abies	GNA
PAB00058899	Picea abies	GNA
PAB00020485	Picea abies	GNA
PAB00047806	Picea abies	GNA
PAB00052174	Picea abies	GNA
PAB00006965	Picea abies	GNA
PAB00006043	Picea abies	GNA
PAB00022066	Picea abies	GNA
PAB00015196	Picea abies	GNA
PAB00035077	Picea abies	GNA
PAB00045569	Picea abies	GNA
PAB00006255	Picea abies	GNA
PAB00019111	Picea abies	GNA
PAB00048829	Picea abies	GNA
PAB00023172	Picea abies	GNA
PAB00002510	Picea abies	GNA
PAB00038546	Picea abies	GNA
PAB00030176	Picea abies	GNA
PAB00006042	Picea abies	GNA
PAB00008592	Picea abies	GNA
PAB00055185	Picea abies	GNA
PAB00001667	Picea abies	GNA
PAB00028080	Picea abies	GNA
PAB00050520	Picea abies	GNA
PAB00006633	Picea abies	GNA
PAB00012667	Picea abies	GNA
PAB00061320	Picea abies	GNA
PAB00012272	Picea abies	GNA
PAB00013812	Picea abies	GNA
PAB00029785	Picea abies	GNA
PAB00010444	Picea abies	GNA
PAB00031637	Picea abies	GNA
PAB00002918	Picea abies	GNA
PAB00006963	Picea abies	GNA
PAB00057098	Picea abies	GNA
PAB00004417	Picea abies	GNA
PAB00032888	Picea abies	GNA
PAB00043022	Picea abies	GNA
PAB00059742	Picea abies	GNA
PAB00056886	Picea abies	GNA
PAB00065087	Picea abies	GNA
PAB00023667	Picea abies	GNA
PAB00012623	Picea abies	GNA
PAB00005908	Picea abies	GNA
PAB00012666	Picea abies	GNA
PAB00008393	Picea abies	GNA
PAB00057412	Picea abies	GNA
PAB00037168	Picea abies	GNA
PAB00047573	Picea abies	GNA
PAB00015798	Picea abies	GNA
PAB00021169	Picea abies	GNA
PAB00061669	Picea abies	GNA
PAB00004767	Picea abies	GNA
PAB00023429	Picea abies	GNA
PAB00065385	Picea abies	GNA
PAB00048530	Picea abies	GNA
PAB00022022	Picea abies	GNA
PAB00015797	Picea abies	GNA
PAB00037487	Picea abies	GNA
PAB00006256	Picea abies	GNA
PAB00032756	Picea abies	GNA
PAB00038107	Picea abies	GNA
PAB00051613	Picea abies	GNA
PAB00025048	Picea abies	GNA
PAB00031359	Picea abies	GNA
PAB00031670	Picea abies	GNA
PAB00010694	Picea abies	GNA
PAB00023284	Picea abies	GNA
PAB00038909	Picea abies	GNA
PAB00055439	Picea abies	GNA
PAB00029000	Picea abies	GNA
PAB00034465	Picea abies	GNA
PAB00020322	Picea abies	GNA
PAB00005901	Picea abies	GNA
PAB00065927	Picea abies	GNA
PAB00006618	Picea abies	GNA
PAB00012496	Picea abies	GNA
PAB00044547	Picea abies	GNA
PAB00012921	Picea abies	GNA
PAB00043000	Picea abies	GNA
PAB00047156	Picea abies	GNA
PAB00016381	Picea abies	GNA
PAB00016380	Picea abies	GNA
PAB00015195	Picea abies	GNA
PAB00057817	Picea abies	GNA
PAB00034958	Picea abies	GNA
PAB00045249	Picea abies	GNA
PAB00032218	Picea abies	GNA
PAB00043299	Picea abies	GNA
PAB00004768	Picea abies	GNA
PAB00063296	Picea abies	GNA
PAB00031618	Picea abies	GNA
PAB00004846	Picea abies	GNA
PAB00053361	Picea abies	Hevein
PAB00052740	Picea abies	Hevein
PAB00052235	Picea abies	Hevein
PAB00007291	Picea abies	Hevein
PAB00045735	Picea abies	Hevein
PAB00029773	Picea abies	Hevein
PAB00048459	Picea abies	Hevein
PAB00025402	Picea abies	Hevein
PAB00007121	Picea abies	Hevein
PAB00002751	Picea abies	Hevein
PAB00060415	Picea abies	Hevein
PAB00048033	Picea abies	Hevein
PAB00037069	Picea abies	Hevein
PAB00063547	Picea abies	Hevein
PAB00039007	Picea abies	Hevein
PAB00022121	Picea abies	Hevein
PAB00033677	Picea abies	Jacalin
PAB00041473	Picea abies	Jacalin
PAB00040220	Picea abies	Jacalin
PAB00046499	Picea abies	Jacalin
PAB00043452	Picea abies	Jacalin
PAB00032246	Picea abies	Jacalin
PAB00063596	Picea abies	Jacalin
PAB00011512	Picea abies	Jacalin
PAB00048220	Picea abies	Jacalin
PAB00053991	Picea abies	Jacalin
PAB00001504	Picea abies	Jacalin
PAB00035663	Picea abies	Jacalin
PAB00054515	Picea abies	Jacalin
PAB00049998	Picea abies	Jacalin
PAB00044743	Picea abies	Jacalin
PAB00041719	Picea abies	Jacalin
PAB00063805	Picea abies	Jacalin
PAB00019262	Picea abies	legume lectin
PAB00065888	Picea abies	legume lectin
PAB00026617	Picea abies	legume lectin
PAB00030953	Picea abies	legume lectin
PAB00062475	Picea abies	legume lectin
PAB00045989	Picea abies	legume lectin
PAB00042753	Picea abies	legume lectin
PAB00041415	Picea abies	legume lectin
PAB00012899	Picea abies	legume lectin
PAB00019631	Picea abies	legume lectin
PAB00012219	Picea abies	legume lectin
PAB00061995	Picea abies	legume lectin
PAB00015430	Picea abies	legume lectin
PAB00036090	Picea abies	legume lectin
PAB00035226	Picea abies	legume lectin
PAB00032723	Picea abies	legume lectin
PAB00038994	Picea abies	legume lectin
PAB00043472	Picea abies	legume lectin
PAB00045620	Picea abies	legume lectin
PAB00066330	Picea abies	legume lectin
PAB00062037	Picea abies	legume lectin
PAB00010009	Picea abies	legume lectin
PAB00007860	Picea abies	legume lectin
PAB00062081	Picea abies	legume lectin
PAB00054156	Picea abies	legume lectin
PAB00035581	Picea abies	legume lectin
PAB00039298	Picea abies	legume lectin
PAB00010010	Picea abies	legume lectin
PAB00018011	Picea abies	legume lectin
PAB00045126	Picea abies	legume lectin
PAB00020782	Picea abies	legume lectin
PAB00003400	Picea abies	legume lectin
PAB00013537	Picea abies	legume lectin
PAB00054145	Picea abies	legume lectin
PAB00034245	Picea abies	legume lectin
PAB00036469	Picea abies	legume lectin
PAB00027971	Picea abies	legume lectin
PAB00006149	Picea abies	legume lectin
PAB00012218	Picea abies	legume lectin
PAB00026923	Picea abies	legume lectin
PAB00051243	Picea abies	legume lectin
PAB00001613	Picea abies	legume lectin
PAB00052886	Picea abies	legume lectin
PAB00010371	Picea abies	legume lectin
PAB00034793	Picea abies	legume lectin
PAB00044668	Picea abies	legume lectin
PAB00026062	Picea abies	legume lectin
PAB00033565	Picea abies	legume lectin
PAB00062602	Picea abies	legume lectin
PAB00021002	Picea abies	legume lectin
PAB00036237	Picea abies	legume lectin
PAB00002326	Picea abies	legume lectin
PAB00043649	Picea abies	legume lectin
PAB00000455	Picea abies	legume lectin
PAB00033234	Picea abies	legume lectin
PAB00033023	Picea abies	legume lectin
PAB00015431	Picea abies	legume lectin
PAB00057110	Picea abies	legume lectin
PAB00066277	Picea abies	legume lectin
PAB00009898	Picea abies	legume lectin
PAB00033302	Picea abies	legume lectin
PAB00022619	Picea abies	legume lectin
PAB00027212	Picea abies	legume lectin
PAB00043913	Picea abies	legume lectin
PAB00055251	Picea abies	legume lectin
PAB00043650	Picea abies	legume lectin
PAB00020602	Picea abies	legume lectin
PAB00033380	Picea abies	legume lectin
PAB00025549	Picea abies	legume lectin
PAB00028487	Picea abies	legume lectin
PAB00027735	Picea abies	legume lectin
PAB00042752	Picea abies	legume lectin
PAB00002819	Picea abies	legume lectin
PAB00022093	Picea abies	legume lectin
PAB00029180	Picea abies	legume lectin
PAB00008777	Picea abies	legume lectin
PAB00005554	Picea abies	legume lectin
PAB00054310	Picea abies	legume lectin
PAB00015432	Picea abies	legume lectin
PAB00066415	Picea abies	legume lectin
PAB00047759	Picea abies	legume lectin
PAB00026265	Picea abies	legume lectin
PAB00033675	Picea abies	legume lectin
PAB00000002	Picea abies	legume lectin
PAB00009129	Picea abies	legume lectin
PAB00061168	Picea abies	legume lectin
PAB00013145	Picea abies	legume lectin
PAB00035549	Picea abies	legume lectin
PAB00040889	Picea abies	legume lectin
PAB00053242	Picea abies	legume lectin
PAB00059376	Picea abies	legume lectin
PAB00051711	Picea abies	legume lectin
PAB00045590	Picea abies	legume lectin
PAB00019640	Picea abies	legume lectin
PAB00044872	Picea abies	legume lectin
PAB00008186	Picea abies	legume lectin
PAB00041702	Picea abies	legume lectin
PAB00059364	Picea abies	legume lectin
PAB00015850	Picea abies	legume lectin
PAB00013932	Picea abies	legume lectin
PAB00020392	Picea abies	legume lectin
PAB00041701	Picea abies	legume lectin
PAB00048766	Picea abies	legume lectin
PAB00041007	Picea abies	legume lectin
PAB00057623	Picea abies	legume lectin
PAB00018221	Picea abies	legume lectin
PAB00017536	Picea abies	legume lectin
PAB00010011	Picea abies	legume lectin
PAB00052680	Picea abies	legume lectin
PAB00035018	Picea abies	legume lectin
PAB00030842	Picea abies	legume lectin
PAB00002229	Picea abies	legume lectin
PAB00011404	Picea abies	legume lectin
PAB00065814	Picea abies	legume lectin
PAB00047476	Picea abies	LysM
PAB00063684	Picea abies	LysM
PAB00055504	Picea abies	LysM
PAB00032650	Picea abies	LysM
PAB00026933	Picea abies	LysM
PAB00025487	Picea abies	LysM
PAB00053807	Picea abies	LysM
PAB00010827	Picea abies	LysM
PAB00043544	Picea abies	LysM
PAB00018831	Picea abies	LysM
PAB00060253	Picea abies	LysM
PAB00027089	Picea abies	LysM
PAB00016687	Picea abies	LysM
PAB00002891	Picea abies	LysM
PAB00014579	Picea abies	LysM
PAB00017642	Picea abies	LysM
PAB00063770	Picea abies	LysM
PAB00016158	Picea abies	LysM
PAB00053804	Picea abies	LysM
PAB00039312	Picea abies	LysM
PAB00059933	Picea abies	LysM
PAB00001243	Picea abies	LysM
PAB00018248	Picea abies	LysM
PAB00001407	Picea abies	LysM
PAB00026015	Picea abies	LysM
PAB00028163	Picea abies	LysM
PAB00014182	Picea abies	LysM
PAB00054844	Picea abies	LysM
PAB00019534	Picea abies	LysM
PAB00016752	Picea abies	LysM
PAB00014456	Picea abies	LysM
PAB00012160	Picea abies	LysM
PAB00035242	Picea abies	LysM
PAB00049764	Picea abies	LysM
PAB00064778	Picea abies	LysM
PAB00054912	Picea abies	LysM
PAB00022452	Picea abies	Nictaba
PAB00014838	Picea abies	Nictaba
PAB00058243	Picea abies	Nictaba
PAB00033274	Picea abies	Nictaba
PAB00008414	Picea abies	Nictaba
PAB00013786	Picea abies	Nictaba
PAB00033976	Picea abies	Nictaba
PAB00040932	Picea abies	Nictaba
PAB00014461	Picea abies	Nictaba
PAB00008836	Picea abies	Nictaba
PAB00044894	Picea abies	Nictaba
PAB00056869	Picea abies	Nictaba
PAB00016928	Picea abies	Nictaba
PAB00008837	Picea abies	Nictaba
PAB00049884	Picea abies	Nictaba
PAB00032463	Picea abies	Nictaba
PAB00028799	Picea abies	Nictaba
PAB00020214	Picea abies	Nictaba
PAB00054149	Picea abies	Nictaba
PAB00064282	Picea abies	Nictaba
PAB00040739	Picea abies	Nictaba
PAB00043456	Picea abies	Nictaba
PAB00009593	Picea abies	Nictaba
PAB00042980	Picea abies	Nictaba
PAB00066054	Picea abies	Nictaba
PAB00033015	Picea abies	Nictaba
PAB00031723	Picea abies	Nictaba
PAB00060282	Picea abies	Malectin
PAB00062035	Picea abies	Malectin
PAB00013542	Picea abies	Malectin
PAB00013155	Picea abies	Malectin
PAB00054976	Picea abies	Malectin
PAB00043546	Picea abies	Malectin
PAB00045084	Picea abies	Malectin
PAB00032825	Picea abies	Malectin
PAB00043897	Picea abies	Malectin
PAB00028539	Picea abies	Malectin
PAB00005732	Picea abies	Malectin
PAB00011838	Picea abies	Malectin
PAB00033561	Picea abies	Malectin
PAB00058465	Picea abies	Malectin
PAB00021732	Picea abies	Malectin
PAB00052247	Picea abies	Malectin
PAB00021371	Picea abies	Malectin
PAB00001021	Picea abies	Malectin
PAB00042303	Picea abies	Malectin
PAB00042676	Picea abies	Malectin
PAB00009705	Picea abies	Malectin
PAB00058033	Picea abies	Malectin
PAB00001272	Picea abies	Malectin
PAB00050585	Picea abies	Malectin
PAB00021372	Picea abies	Malectin
PAB00035593	Picea abies	Malectin
PAB00062089	Picea abies	Malectin
PAB00058219	Picea abies	Malectin
PAB00035812	Picea abies	Malectin
PAB00053064	Picea abies	Malectin
PAB00010058	Picea abies	Malectin
PAB00021616	Picea abies	Malectin
PAB00001029	Picea abies	Malectin
PAB00006709	Picea abies	Malectin
PAB00044604	Picea abies	Malectin
PAB00012075	Picea abies	Malectin
PAB00058547	Picea abies	Malectin
PAB00040915	Picea abies	Malectin
PAB00006224	Picea abies	Malectin
PAB00009226	Picea abies	Malectin
PAB00063891	Picea abies	Malectin
PAB00024912	Picea abies	Malectin
PAB00007577	Picea abies	Malectin
PAB00016618	Picea abies	Malectin
PAB00009750	Picea abies	Malectin
PAB00032848	Picea abies	Malectin
PAB00054724	Picea abies	Malectin
PAB00030695	Picea abies	Malectin
PAB00038991	Picea abies	Malectin
PAB00059657	Picea abies	Malectin
PAB00013541	Picea abies	Malectin
PAB00040916	Picea abies	Malectin
PAB00043453	Picea abies	Malectin
PAB00029920	Picea abies	Malectin
PAB00051144	Picea abies	Malectin
PAB00024901	Picea abies	Malectin
PAB00025598	Picea abies	Malectin
PAB00050650	Picea abies	Malectin
PAB00060660	Picea abies	Malectin
PAB00021120	Picea abies	Malectin
PAB00021723	Picea abies	Malectin
PAB00005149	Picea abies	Malectin
PAB00007687	Picea abies	Malectin
PAB00059175	Picea abies	Malectin
PAB00056033	Picea abies	Malectin
PAB00045563	Picea abies	Malectin
PAB00061753	Picea abies	Malectin
PAB00063430	Picea abies	Malectin
PAB00060138	Picea abies	Malectin
PAB00002685	Picea abies	Malectin
PAB00042517	Picea abies	Malectin
PAB00054315	Picea abies	Malectin
PAB00014089	Picea abies	Malectin
PAB00004050	Picea abies	Malectin
PAB00010394	Picea abies	Malectin
PAB00011839	Picea abies	Malectin
PAB00022313	Picea abies	Malectin
PAB00057855	Picea abies	Malectin
PAB00017415	Picea abies	Malectin
PAB00014139	Picea abies	Malectin
PAB00062785	Picea abies	Malectin
PAB00036343	Picea abies	Malectin
PAB00048144	Picea abies	Malectin
PAB00044925	Picea abies	Malectin
PAB00026543	Picea abies	Malectin
PAB00032396	Picea abies	Malectin
PAB00039949	Picea abies	Malectin
PAB00040495	Picea abies	Malectin
PAB00028918	Picea abies	Malectin
PAB00046116	Picea abies	Malectin
PAB00025912	Picea abies	Malectin
PAB00053251	Picea abies	Malectin
PAB00029406	Picea abies	Malectin
PAB00027230	Picea abies	Malectin
PAB00016608	Picea abies	Malectin
PAB00064105	Picea abies	Malectin
PAB00004008	Picea abies	Malectin
PAB00058016	Picea abies	Ricin B
PAB00006993	Picea abies	Ricin B
PAB00066258	Picea abies	Ricin B
PAB00021364	Picea abies	Ricin B
PAB00042993	Picea abies	Ricin B
PAB00036975	Picea abies	Ricin B
GBI00015999	Ginkgo biloba	amaranthin
GBI00021655	Ginkgo biloba	amaranthin
GBI00019885	Ginkgo biloba	EUL
GBI00028294	Ginkgo biloba	EUL
GBI00023625	Ginkgo biloba	EUL
GBI00018199	Ginkgo biloba	EUL
GBI00024999	Ginkgo biloba	EUL
GBI00021216	Ginkgo biloba	GNA
GBI00017568	Ginkgo biloba	GNA
GBI00017971	Ginkgo biloba	Hevein
GBI00023847	Ginkgo biloba	Hevein
GBI00013582	Ginkgo biloba	Jacalin
GBI00015163	Ginkgo biloba	Jacalin
GBI00029711	Ginkgo biloba	Jacalin
GBI00028192	Ginkgo biloba	Jacalin
GBI00015507	Ginkgo biloba	Jacalin
GBI00030005	Ginkgo biloba	Jacalin
GBI00029504	Ginkgo biloba	Jacalin
GBI00013572	Ginkgo biloba	legume lectin
GBI00014359	Ginkgo biloba	legume lectin
GBI00004469	Ginkgo biloba	legume lectin
GBI00026822	Ginkgo biloba	legume lectin
GBI00001600	Ginkgo biloba	legume lectin
GBI00018005	Ginkgo biloba	LysM
GBI00015619	Ginkgo biloba	LysM
GBI00010345	Ginkgo biloba	LysM
GBI00017075	Ginkgo biloba	LysM
GBI00006568	Ginkgo biloba	LysM
GBI00027732	Ginkgo biloba	LysM
GBI00011147	Ginkgo biloba	LysM
GBI00020836	Ginkgo biloba	LysM
GBI00019742	Ginkgo biloba	LysM
GBI00007675	Ginkgo biloba	LysM
GBI00023811	Ginkgo biloba	LysM
GBI00006503	Ginkgo biloba	LysM
GBI00005591	Ginkgo biloba	LysM
GBI00018616	Ginkgo biloba	LysM
GBI00027209	Ginkgo biloba	LysM
GBI00008440	Ginkgo biloba	Nictaba
GBI00020303	Ginkgo biloba	Nictaba
GBI00007178	Ginkgo biloba	Nictaba
GBI00028837	Ginkgo biloba	Malectin
GBI00012273	Ginkgo biloba	Malectin
GBI00013900	Ginkgo biloba	Malectin
GBI00009780	Ginkgo biloba	Malectin
GBI00012378	Ginkgo biloba	Malectin
GBI00021534	Ginkgo biloba	Malectin
GBI00018290	Ginkgo biloba	Malectin
GBI00015058	Ginkgo biloba	Malectin
GBI00007807	Ginkgo biloba	Malectin
GBI00016628	Ginkgo biloba	Ricin B
GBI00019659	Ginkgo biloba	Ricin B
